# Supplementary material for: Immobilization of cytochrome c at Au electrodes by association of a pyridine terminated SAM and the heme of cytochrome
Source: Royal Society of Chemistry journal article supplement (doi:10.1039/b101767p), 2001-01-01
Supplement: b101767p.doc [file b101767p.doc]

# Electronic Supplementary Information

# Chemicals.

# N,N’-dicyclohexylcarbodiimide, or DCC, (99%) was purchased from Alfa Aesar. 16-mercaptohexadecanoic acid, 6-chloro-1-hexanol (96%), thiourea, 4-(dimethylamino)-pyridine, or DMAP, (99%) were purchased from Aldrich. 11-Bromo-1-undecanol (97%) was obtained from Lancaster. 2-Hydroxyethyl disulfide was obtained from Acros Organics. 6-Mercapto-1-hexanol and 11-mercapto-1-undecanol were prepared from 6-chloro-1-hexanol and 11-bromo-1-undecanol by reacting with thiourea and hydrolyzing with NaOH solution. Pyridine was purchased from Aldrich, and was purified by distillation before the electrochemical measurements. 11-Mercaptoundecanoic acid was purchased from Aldrich and used without further purification.

1. Preparation of disulfides.

Scheme 1

*Bis(6-hydroxyhexanyl) disulfide:* 6-Mercapto-1-hexanol (6.0 g, 44.696 mmol) was dissolved in 10 mL methanol and titrated with 0.5 M methanolic iodine until the reaction turned from colorless to a persistent yellow. The reaction was quenched with 10% sodium bisulfite to a colorless solution. The resulting mixture was dissolved in distilled water and extracted with CH2Cl2, and the solvent was removed under vacuum. Purification of the resulting crude disulfide was performed by flash chromatography (CH3Cl) to afford the disulfide (5.35 g) as a white solid in 90% yield. 1H NMR (300 MHz) CDCl3:  3.649 (t, J= 6.435, 4H); 2.690 (t, J= 7.275, 4H); 1.703 (m, 4H); 1.584 (m, 4H); 1.510-1.375 (m, 8H).

*Bis(11-hydroxyundecyl) disulfide:* 1H NMR (300 MHz) CDCl3:  3.651 (q, J= 6.18, 4H ); 2.689 (t, J= 7.34, 4H); 1.679 (m, 4H); 1.579 (m, 4H), 1.379-1.290 (broad, 28 H).

*Bis(16-hydroxyhexadecyl)disulfide:* 16-Mercapto-hexadecanol was prepared by reducing 16-mercaptohexadecanoic acid in ethyl ether using LiAlH4. Diluted NaOH solution was used to quench the reaction. The resulting solution was dissolved in 0.2 M HCl and extracted with CH2Cl2. The solvent was removed under vacuum. Purification of the resulting crude 16-mercapto-hexadecanol was performed by flash chromatography (CH3Cl). 1H NMR (300 MHz) CDCl3:  3.646 (t,J= 6.615, 2H ); 2.527 (q, J= 7.34, 2H); 1.603 (m, 6H); 1.327 (broad, 23H); Bis(16-hydroxyhexadecyl)disulfide is insoluble in common solvents, such as CH2Cl2, so we are unable to obtain its NMR data.

2. Preparation of pyridine derivatives.

Scheme 2

*Bis[6-((pyridinylcarbonyl)oxy)hexanyl]disulfide:* 1,2-dicyclohexylcarbodiimide (DCC) (4.13 g, 20.02 mmol) was added to 20 mL of dichloromethane solution of bis(6-hydroxyhexanyl) disulfide (2.42 g, 9.10 mmol), isonicotic acid (2.24 g, 18.20 mmol) and 4-dimethylaminopyridine (0.22 g, 1.82 mmol) at 0 oC. After one hour, the solution was allowed to warm to room temperature and stirring was continued for 4 days. After removal of the precipitated dicyclohexylurea (DCU) by filtration, the solvent was removed under reduced pressure to yield a crude solid. The solid was recrystallized with ethanol and chromatographed on silica gel (60-200 mesh) with ethyl acetate. Evaporation of the solvent yielded the disulfide as 3.45 g of a white solid. 1H NMR (300 MHz) CDCl3:  8.789 (d, J= 5.97, 4H); 7.849 (d, J= 5.97, 4H); 4.362 (t, J= 6.615, 4H); 2.695 (t, J= 7.215, 4H); 1.802 (m, 4H), 1.723 (m, 4H); 1.488-1.453 (m, 8H).

*Bis[2-((4-pyridinylcarbonyl)oxy)ethyl]disulfide:*1H NMR (300 MHz) CDCl3:  8.737 (d, 6.00 Hz, 4H); 7.799 (d, J= 6.03 Hz, 4H); 4.595 (t, J= 6.50 Hz, 4H); 3.052 (t, J= 6.51 Hz, 4H). EI-HRMS: Calcd. 364.0558, (C16H16N2O4S2), Found 364.0552.

*Bis[11-((4-pyridinylcarbonyl)oxy)undecyl]disulfide:*1H NMR (300 MHz) CDCl3:  8.810 (s, 4H); 7.901(d, J= 5.73, 4H ); 4.367 (t, J= 6.63, 4H); 2.684 (t, J=7.32, 4H); 1.789 (m, 4H); 1.675 (m, 4H); 1.43-1.29 (broad, 28H). EI-HRMS: Calcd. 616.3385 (C34H52N2O4S2), Found 616.3369.

*Bis[16-((4-pyridinylcarbony)oxy)hexadecyl]disulfide:* 1H NMR (300 MHz) CDCl3:  8.889 (s, 4H); 7.869 (d, J= 5.46, 4H ); 4.359 (t, J= 6.705, 4H); 2.683 (t, J= 7.36, 4H); 1.781 (m, 8H); 1.673 (m, 4H); 1.43-1.29 (broad, 44H). EI-HRMS: Calcd. 756.4896 (C44H72N2O4S2), Found 756.4934.

*Bis[11-((4-methyl-4-pyridinylcarbony)oxy)undecyl]disulfide, diiodides:* Bis[11-((4-pyridinylcarbonyl)oxy)undecyl]disulfide was refluxed with excess of iodomethane in ethanol for 24 hours under nitrogen. The solution was cooled down to room temperature and the precipitate formed was filtered and recrystalized with ethanol and acetone for three times. A brown solid was obtained. 1H NMR (300 MHz) CDCl3:  9.501 (d, J= 6.54, 4H); 8.515 (d, J= 6.46, 4H ); 4.834 (s, 6H); 4.449 (t, J= 6.614, 4H); 2.694 (t, J= 7.301, 4H); 1.818 (m, 4H); 1.678 (m, 8H); 1.476-1.216 (broad, 24H).

*Cytochrome c.*

Horse heart Cyt c (Type VI, 95 %) was purchased from Sigma. Because the electron transfer rate constant of unpurified Cyt c was found to be much slower than that of the purified compound, only data for the purified Cyt c samples were given. The Cyt c was purified in a cold room at 5 C by the reported method.[[1]](#endnote-2) 30 mg of Cyt c was dissolved in 2 ml of 50 mM phosphate buffer solution at pH 7 (25 mM Na2HPO4 and 25 mM NaH2PO4). A small amount of K3Fe(CN)6 was added to the solution to oxidize the protein. The Cyt c solution was placed onto a 1.5 cm diameter  30 cm long column containing carboxymethyl cellulose (Whatman, CM-52) that was pretreated with 25 mM of the phosphate buffer. The protein was eluted with 50, 60, 70, and 80 mM phosphate buffer in a stepwise manner. The center of the last separated portion was collected. The phosphate buffer was removed from the protein through an ultrafiltiration membrane (Millipore, YM10) under pressure. The Cyt c aqueous solution was quickly frozen at –80 C, and dried in vacuum. HPLC analysis of the purified protein showed no impurity. The protein was stored under Ar pressure in a freezer until use.

## *The preparation of electrodes.*

A gold wire (99.99 %, 0.5 mm diameter) was cleaned in concentrated nitric acid (68-70 %) at 130 C under reflux for more than 12 hrs. Subsequently it was thoroughly washed with deionized water (18 M). The tip of the wire was melted using a gas flame to make a smooth, approximately spherical surface on the electrode, and then quenched with deionized water. This procedure was repeated at least 10 times. The wire was sealed into a glass capillary with the flame, and the melted tip was annealed again and cooled down under argon flow.

The electrodes were immersed in ethanol, or CH2Cl2, solutions of the above thiol compounds (5-10 mM) for 1 to 2 days to prepare the SAMs on the electrodes. The electrodes with the SAMs were immersed in a 30-50 M Cyt c solution, which was purged with Ar, for 30 mins to immobilize the Cyt c on the SAMs.

After the electrochemical measurements, the SAMs were removed by dipping them in a “piranha” solution (30 % H2O2 : 98 % H2SO4 = 1 : 3 vol/vol) for 15-20 sec. The surface ‘areas’ of the electrodes were determined by voltammetry. In particular, the dependence of the peak current on the square root of the scan rate was measured for a solution of aqueous 0.5 M K2SO4 containing 1mM K3Fe(CN)6 and 1mM K4Fe(CN)6.[[2]](#endnote-3)

1. Brutigan, D.L.; Ferguson, S.; Margoliash, E. *Methods in Enzymology*; Fleischer, S. and Packer, L Ed.; Academic Press, New York, **1978**,Vol. LIII, pp. 131-132. [↑](#endnote-ref-2)
2. Sawyer, D. T.; Roberts, Jr, J. L. *Experimental Electrochemistry for chemists*; John Wiley & Sons; New York, **1974**, pp.77 and 338. A diffusion constant of Fe(CN)63-/4- was assumed to be 7.63  10–6 cm2/sec. [↑](#endnote-ref-3)
